# Supplementary material
Source: Springer Nature journal article supplement (https://www.springerprofessional.de/resource/supplementary/13638_2013_674_MOESM4_ESM.pdf/11898240)

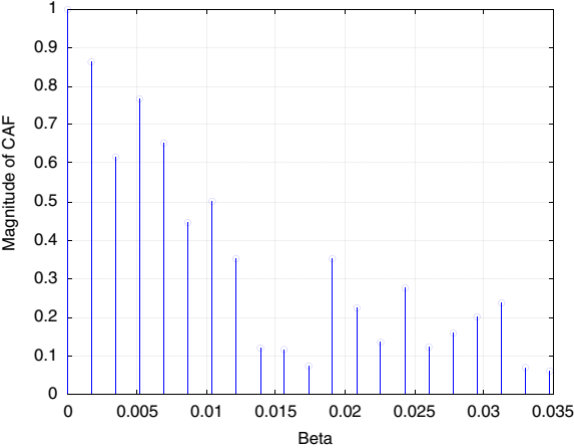

Supplement: MOESM4 [file 11898240]
